# Supplementary material for: Axonal sprouting in the dorsal cochlear nucleus affects gap-prepulse inhibition following noise exposure
Source: PubMed Central journal article supplement — Int J Mol Med. 2019 Aug 19;44(4):1473–83. doi: 10.3892/ijmm.2019.4316 (PMC6713418; doi:10.3892/ijmm.2019.4316), 2019-08-19
Supplement: Supplementary_Data.pdf [file Supplementary_Data.pdf]

Table SI. Mean ABR thresholds (dB SPL) at the left side in the second section.

| Stage | Time point | Non-tinnitus group |          |          |          | Tinnitus group |          |          |          |
|-------|------------|--------------------|----------|----------|----------|----------------|----------|----------|----------|
|       |            | 3 kHz              | 7 kHz    | 11 kHz   | 15 kHz   | 3 kHz          | 7 kHz    | 11 kHz   | 15 kHz   |
| 1st   | Baseline   | 21.7±4.1           | 23.3±5.2 | 23.3±4.1 | 23.3±5.2 | 22.1±3.9       | 22.1±3.9 | 22.1±3.9 | 22.9±3.9 |
|       | Day 1      | 40.8±4.9           | 52.5±5.2 | 65.8±4.9 | 60.8±7.4 | 41.4±6.9       | 50.7±6.7 | 67.1±7.0 | 61.4±7.5 |
|       | Week 1     | 30.0±7.1           | 31.7±7.5 | 42.5±6.1 | 40.0±6.3 | 31.4±6.9       | 32.9±7.6 | 40.0±6.5 | 37.9±7.6 |
| 2nd   | Baseline   | 21.7±4.1           | 22.5±4.2 | 22.5±4.2 | 21.7±4.1 | 22.1±3.9       | 22.1±3.9 | 22.1±3.9 | 22.1±3.9 |
|       | Day 1      | 35.0±4.5           | 47.5±6.1 | 67.5±5.2 | 62.5±5.2 | 37.9±6.4       | 50.0±6.5 | 64.3±5.3 | 59.3±7.3 |
|       | Week 1     | 32.5±7.6           | 34.2±7.4 | 45.0±7.7 | 42.5±8.8 | 31.4±6.9       | 34.3±6.7 | 42.1±7.6 | 40.7±7.9 |
|       | Week 2     | 28.3±5.2           | 29.2±6.6 | 42.5±4.2 | 38.3±8.2 | 27.1±4.9       | 30.0±6.5 | 39.3±4.5 | 35.0±5.0 |
| 3rd   | Baseline   | 21.4±3.8           | 22.9±4.9 | 22.1±3.9 | 22.1±3.9 | 21.9±3.7       | 21.3±3.5 | 23.1±4.6 | 22.5±3.8 |
|       | Day 1      | 37.9±4.9           | 50.0±6.5 | 67.9±7.0 | 64.3±7.9 | 34.4±8.2       | 51.9±5.9 | 67.5±6.5 | 60.6±7.8 |
|       | Week 1     | 31.4±6.9           | 33.6±8.0 | 42.9±7.0 | 40.7±7.9 | 30.0±7.6       | 31.3±8.3 | 43.1±5.3 | 40.0±7.6 |
|       | Week 2     | 27.1±5.7           | 27.9±7.0 | 40.7±6.1 | 37.9±8.6 | 26.3±5.2       | 28.8±6.9 | 39.4±4.2 | 36.9±7.0 |
|       | Week 3     | 22.1±3.9           | 22.1±3.9 | 25.0±5.0 | 22.9±4.9 | 22.5±4.6       | 22.5±4.6 | 25.0±5.3 | 25.6±5.0 |
| 4th   | Baseline   | 22.1±3.9           | 22.9±3.9 | 23.6±4.8 | 22.1±3.9 |                |          |          |          |

Data are presented as the mean ± SD. ABR, auditory brainstem response; SPL, sound pressure level.

Table SII. GPIAS recordings in the second section.

|                           |                             | Center frequency of the background noise |                              |         |          |                      |                              |         |          |                      |                              |         |          |                      |                              |         |          |                      |
|---------------------------|-----------------------------|------------------------------------------|------------------------------|---------|----------|----------------------|------------------------------|---------|----------|----------------------|------------------------------|---------|----------|----------------------|------------------------------|---------|----------|----------------------|
|                           |                             | 3 kHz                                    |                              |         |          | 7 kHz                |                              |         |          | 11 kHz               |                              |         |          | 15 kHz               |                              |         |          |                      |
| Group                     | Exposure                    | No.                                      | GPIAS value (%) <sup>a</sup> | RMS-GSR | RMS-NGSR | P-value <sup>b</sup> | GPIAS value (%) <sup>a</sup> | RMS-GSR | RMS-NGSR | P-value <sup>b</sup> | GPIAS value (%) <sup>a</sup> | RMS-GSR | RMS-NGSR | P-value <sup>b</sup> | GPIAS value (%) <sup>a</sup> | RMS-GSR | RMS-NGSR | P-value <sup>b</sup> |
| Controls                  | Before noise exposure       | 1                                        | 67                           | 0.131   | 0.396    | <0.001               | 54.8                         | 0.101   | 0.224    | <0.001               | 67.5                         | 0.161   | 0.497    | <0.001               | 56.8                         | 0.161   | 0.373    | <0.001               |
|                           |                             | 2                                        | 39                           | 0.174   | 0.285    | <0.001               | 69.4                         | 0.11    | 0.359    | <0.001               | 68                           | 0.104   | 0.325    | 0.01                 | 58.3                         | 0.101   | 0.243    | 0.002                |
|                           |                             | 3                                        | 67.8                         | 0.07    | 0.217    | <0.001               | 60.9                         | 0.054   | 0.139    | <0.001               | 67.5                         | 0.145   | 0.445    | <0.001               | 63.4                         | 0.14    | 0.384    | <0.001               |
|                           |                             | 4                                        | 61.9                         | 0.178   | 0.467    | <0.001               | 50.3                         | 0.177   | 0.356    | 0.006                | 42.6                         | 0.323   | 0.563    | 0.04                 | 58.3                         | 0.142   | 0.34     | 0.001                |
|                           |                             | 5                                        | 65                           | 0.191   | 0.545    | <0.001               | 39                           | 0.213   | 0.348    | 0.001                | 38.3                         | 0.201   | 0.327    | 0.015                | 66.4                         | 0.158   | 0.47     | <0.001               |
|                           |                             | 6                                        | 36.5                         | 0.251   | 0.395    | 0.03                 | 61                           | 0.115   | 0.295    | 0.009                | 35.4                         | 0.266   | 0.411    | 0.026                | 62.5                         | 0.194   | 0.517    | <0.001               |
|                           |                             | 7                                        | 40.4                         | 0.203   | 0.341    | 0.021                | 40.5                         | 0.176   | 0.296    | 0.017                | 43.6                         | 0.185   | 0.327    | 0.038                | 45.9                         | 0.195   | 0.36     | 0.017                |
| Week 1 non-tinnitus group | Before noise exposure       | 1                                        | 38.4                         | 0.268   | 0.436    | 0.029                | 43.3                         | 0.34    | 0.599    | 0.022                | 39.9                         | 0.348   | 0.58     | 0.021                | 45.5                         | 0.26    | 0.477    | 0.001                |
|                           |                             | 2                                        | 37.3                         | 0.332   | 0.529    | 0.036                | 56.1                         | 0.164   | 0.374    | 0.003                | 36.8                         | 0.134   | 0.213    | 0.013                | 64.5                         | 0.099   | 0.278    | 0.001                |
|                           |                             | 3                                        | 45.1                         | 0.239   | 0.436    | 0.002                | 45.1                         | 0.289   | 0.527    | 0.012                | 66.1                         | 0.081   | 0.24     | <0.001               | 56.5                         | 0.156   | 0.358    | 0.002                |
|                           |                             | 4                                        | 42.5                         | 0.302   | 0.525    | 0.012                | 56.9                         | 0.193   | 0.448    | <0.001               | 44.6                         | 0.18    | 0.325    | 0.017                | 63.7                         | 0.057   | 0.157    | <0.001               |
|                           |                             | 5                                        | 42.1                         | 0.359   | 0.62     | 0.009                | 42.7                         | 0.152   | 0.264    | 0.032                | 38.7                         | 0.087   | 0.141    | 0.038                | 31.7                         | 0.375   | 0.549    | 0.01                 |
|                           |                             | 6                                        | 33.1                         | 0.26    | 0.388    | 0.044                | 54.7                         | 0.107   | 0.237    | 0.003                | 39.8                         | 0.336   | 0.557    | 0.038                | 46.6                         | 0.157   | 0.294    | 0.028                |
|                           |                             | 7                                        | 51.1                         | 0.306   | 0.625    | <0.001               | 55.9                         | 0.152   | 0.344    | 0.002                | 60.1                         | 0.114   | 0.285    | 0.001                | 33.6                         | 0.202   | 0.305    | 0.017                |
| Week 1 tinnitus group     | 1 week after noise exposure | 1                                        | 47.5                         | 0.183   | 0.35     | <0.001               | 61.5                         | 0.085   | 0.221    | <0.001               | 37.1                         | 0.09    | 0.144    | 0.024                | 44.9                         | 0.087   | 0.158    | 0.002                |
|                           |                             | 2                                        | 50.8                         | 0.266   | 0.541    | 0.001                | 59.3                         | 0.173   | 0.424    | <0.001               | 52.8                         | 0.151   | 0.32     | <0.001               | 40.6                         | 0.318   | 0.534    | 0.049                |
|                           |                             | 3                                        | 48.8                         | 0.17    | 0.332    | <0.001               | 58.5                         | 0.157   | 0.378    | <0.001               | 66.7                         | 0.105   | 0.316    | <0.001               | 60.7                         | 0.052   | 0.131    | <0.001               |
|                           |                             | 4                                        | 51.5                         | 0.215   | 0.443    | <0.001               | 37.1                         | 0.311   | 0.495    | 0.036                | 63.7                         | 0.066   | 0.181    | 0.002                | 60                           | 0.198   | 0.495    | 0.001                |
|                           |                             | 5                                        | 52.6                         | 0.102   | 0.214    | <0.001               | 36.1                         | 0.207   | 0.324    | 0.038                | 32.3                         | 0.314   | 0.464    | 0.002                | 64.1                         | 0.18    | 0.5      | 0.002                |
|                           |                             | 6                                        | 62.9                         | 0.191   | 0.515    | 0.004                | 47.1                         | 0.205   | 0.388    | 0.046                | 41.7                         | 0.125   | 0.214    | 0.033                | 64                           | 0.123   | 0.342    | <0.001               |
|                           |                             | 7                                        | 34.8                         | 0.228   | 0.349    | 0.003                | 36.2                         | 0.25    | 0.392    | 0.001                | 48.7                         | 0.304   | 0.593    | <0.001               | 69.8                         | 0.114   | 0.377    | <0.001               |
| Week 1 tinnitus group     | Before noise exposure       | 1                                        | 57                           | 0.154   | 0.359    | <0.001               | 55                           | 0.109   | 0.243    | <0.001               | 62.5                         | 0.146   | 0.389    | <0.001               | 57.1                         | 0.061   | 0.142    | 0.001                |
|                           |                             | 2                                        | 40.8                         | 0.147   | 0.248    | <0.001               | 42.2                         | 0.089   | 0.153    | 0.012                | 50.7                         | 0.276   | 0.559    | <0.001               | 51.5                         | 0.258   | 0.531    | <0.001               |
|                           |                             | 3                                        | 56.8                         | 0.336   | 0.777    | <0.001               | 60.7                         | 0.198   | 0.503    | <0.001               | 54.2                         | 0.297   | 0.649    | 0.011                | 49.7                         | 0.265   | 0.528    | 0.006                |
|                           |                             | 4                                        | 44.9                         | 0.218   | 0.395    | 0.004                | 41.5                         | 0.256   | 0.437    | 0.042                | 55.3                         | 0.18    | 0.403    | 0.002                | 66.9                         | 0.076   | 0.231    | <0.001               |
|                           |                             | 5                                        | 55.6                         | 0.117   | 0.263    | 0.003                | 51.4                         | 0.291   | 0.599    | 0.022                | 55.4                         | 0.104   | 0.233    | <0.001               | 49.9                         | 0.262   | 0.523    | 0.012                |
|                           |                             | 6                                        | 14.8                         | 0.246   | 0.288    | 0.375                | 42.7                         | 0.237   | 0.415    | 0.005                | 17.7                         | 0.174   | 0.212    | 0.35                 | -6.8                         | 0.229   | 0.214    | 0.973                |
|                           |                             | 7                                        | 39.3                         | 0.141   | 0.232    | 0.011                | 33                           | 0.164   | 0.245    | <0.001               | 2.2                          | 0.39    | 0.399    | 0.857                | 38.3                         | 0.277   | 0.45     | 0.008                |
| Week 1 tinnitus group     | 1 week after noise exposure | 1                                        | 25.6                         | 0.172   | 0.231    | 0.025                | 33.4                         | 0.133   | 0.199    | 0.02                 | 3.6                          | 0.262   | 0.271    | 0.758                | 16.1                         | 0.101   | 0.12     | 0.01                 |
|                           |                             | 2                                        | 27.9                         | 0.12    | 0.167    | 0.122                | 6.5                          | 0.198   | 0.212    | 0.304                | -12.9                        | 0.508   | 0.45     | 0.98                 | -10.8                        | 0.452   | 0.408    | 0.919                |
|                           |                             | 3                                        | 38.6                         | 0.312   | 0.509    | 0.044                | 0                            | 0.435   | 0.435    | 0.911                | 26                           | 0.329   | 0.445    | 0.252                | -0.6                         | 0.314   | 0.312    | 0.926                |
|                           |                             | 4                                        | 32.9                         | 0.09    | 0.134    | 0.032                | 0.7                          | 0.306   | 0.308    | 0.095                | 42.6                         | 0.13    | 0.227    | 0.035                | 58.8                         | 0.107   | 0.259    | 0.008                |
|                           |                             | 5                                        | 19.3                         | 0.339   | 0.42     | 0.449                | 4.3                          | 0.309   | 0.323    | 0.921                | 27.6                         | 0.111   | 0.153    | 0.225                | 67.6                         | 0.208   | 0.642    | <0.001               |

Table SII. Continued.

Center frequency of the background noise

| Group                           | Exposure                 | No.   | 3 kHz                  |                      |                        | 7 kHz                |                        |                      | 11 kHz                 |                      |                        | 15 kHz               |                        |                      |       |       |       |        |
|---------------------------------|--------------------------|-------|------------------------|----------------------|------------------------|----------------------|------------------------|----------------------|------------------------|----------------------|------------------------|----------------------|------------------------|----------------------|-------|-------|-------|--------|
|                                 |                          |       | GPIAS                  | RMS-<br>GSR          | RMS-<br>NGSR           | GPIAS                | RMS-<br>GSR            | RMS-<br>NGSR         | GPIAS                  | RMS-<br>GSR          | RMS-<br>NGSR           | GPIAS                | RMS-<br>GSR            | RMS-<br>NGSR         |       |       |       |        |
|                                 |                          |       | value (%) <sup>a</sup> | P-value <sup>b</sup> |       |       |       |        |
| Week 2<br>non-tinnitus<br>group | Before noise<br>exposure | 1     | 39.6                   | 0.159                | 0.263                  | <0.001               | 34.7                   | 0.375                | 0.575                  | 0.014                | 66.9                   | 0.128                | 0.387                  | <0.001               | 58.7  | 0.176 | 0.426 | <0.001 |
|                                 |                          | 2     | 39.8                   | 0.238                | 0.395                  | 0.007                | 60.8                   | 0.123                | 0.313                  | <0.001               | 60.9                   | 0.092                | 0.234                  | <0.001               | 54.6  | 0.233 | 0.513 | <0.001 |
|                                 |                          | 3     | 37.9                   | 0.221                | 0.356                  | 0.013                | 53.1                   | 0.229                | 0.489                  | <0.001               | 35.6                   | 0.216                | 0.336                  | 0.019                | 56.5  | 0.246 | 0.566 | <0.001 |
|                                 |                          | 4     | 30.4                   | 0.148                | 0.212                  | <0.001               | 40                     | 0.324                | 0.54                   | <0.001               | 43.2                   | 0.127                | 0.224                  | <0.001               | 41.4  | 0.295 | 0.504 | 0.001  |
|                                 |                          | 5     | 46.3                   | 0.137                | 0.255                  | <0.001               | 66.3                   | 0.075                | 0.224                  | <0.001               | 53.7                   | 0.115                | 0.248                  | 0.001                | 54.2  | 0.197 | 0.429 | <0.001 |
|                                 |                          | 6     | 58.1                   | 0.122                | 0.291                  | 0.035                | 63.7                   | 0.079                | 0.217                  | 0.014                | 50.7                   | 0.119                | 0.241                  | 0.001                | 51.1  | 0.207 | 0.423 | <0.001 |
|                                 |                          | 1     | 31.7                   | 0.375                | 0.549                  | 0.011                | 35                     | 0.378                | 0.582                  | 0.022                | 38.7                   | 0.253                | 0.412                  | 0.009                | 45    | 0.339 | 0.616 | 0.003  |
| Week 2<br>tinnitus<br>group     | Before noise<br>exposure | 2     | 49.9                   | 0.244                | 0.487                  | 0.001                | 50.9                   | 0.208                | 0.424                  | 0.001                | 45.6                   | 0.191                | 0.352                  | 0.033                | 62.5  | 0.275 | 0.735 | 0.001  |
|                                 |                          | 3     | 49.4                   | 0.298                | 0.588                  | 0.021                | 31                     | 0.221                | 0.319                  | <0.001               | 34.8                   | 0.265                | 0.406                  | 0.003                | 48    | 0.325 | 0.625 | 0.007  |
|                                 |                          | 4     | 39                     | 0.161                | 0.263                  | 0.042                | 35.7                   | 0.224                | 0.348                  | 0.003                | 37.2                   | 0.177                | 0.282                  | 0.016                | 48.8  | 0.405 | 0.791 | 0.038  |
|                                 |                          | 5     | 34.4                   | 0.253                | 0.385                  | 0.019                | 60.9                   | 0.086                | 0.219                  | <0.001               | 62.8                   | 0.13                 | 0.349                  | <0.001               | 63.4  | 0.204 | 0.556 | <0.001 |
|                                 |                          | 6     | 55.2                   | 0.258                | 0.575                  | 0.001                | 64.9                   | 0.124                | 0.352                  | 0.005                | 43.5                   | 0.295                | 0.523                  | 0.002                | 69.1  | 0.085 | 0.275 | <0.001 |
|                                 |                          | 1     | 38.6                   | 0.326                | 0.53                   | 0.001                | 66.4                   | 0.147                | 0.437                  | <0.001               | 51.8                   | 0.222                | 0.46                   | 0.034                | 42.1  | 0.19  | 0.327 | 0.009  |
|                                 |                          | 2     | 39.8                   | 0.184                | 0.306                  | 0.007                | 52.1                   | 0.113                | 0.236                  | <0.001               | 60.1                   | 0.133                | 0.333                  | 0.017                | 52.3  | 0.118 | 0.247 | <0.001 |
| Week 3<br>non-tinnitus<br>group | Before noise<br>exposure | 3     | 39.2                   | 0.15                 | 0.247                  | 0.032                | 39.4                   | 0.35                 | 0.578                  | 0.019                | 69.6                   | 0.166                | 0.545                  | <0.001               | 47.3  | 0.203 | 0.385 | 0.004  |
|                                 |                          | 4     | 30.1                   | 0.206                | 0.294                  | 0.001                | 44                     | 0.147                | 0.262                  | 0.019                | 30.9                   | 0.204                | 0.295                  | 0.004                | 43.4  | 0.222 | 0.392 | 0.008  |
|                                 |                          | 5     | 61.8                   | 0.14                 | 0.366                  | <0.001               | 53.7                   | 0.21                 | 0.453                  | 0.007                | 68.4                   | 0.176                | 0.555                  | 0.019                | 61.4  | 0.229 | 0.592 | 0.001  |
|                                 |                          | 6     | 59                     | 0.089                | 0.216                  | <0.001               | 38.2                   | 0.187                | 0.303                  | 0.043                | 48.4                   | 0.137                | 0.266                  | 0.002                | 43    | 0.152 | 0.266 | 0.001  |
|                                 |                          | 7     | 46                     | 0.112                | 0.206                  | 0.049                | 55.9                   | 0.107                | 0.241                  | <0.001               | 58.6                   | 0.076                | 0.184                  | 0.007                | 67    | 0.04  | 0.122 | <0.001 |
|                                 |                          | 1     | 45.2                   | 0.238                | 0.435                  | 0.013                | 4.3                    | 0.404                | 0.387                  | 0.423                | 13.2                   | 0.239                | 0.275                  | 0.521                | 51.5  | 0.203 | 0.42  | 0.002  |
|                                 |                          | 2     | 63                     | 0.111                | 0.3                    | 0.002                | 25.5                   | 0.211                | 0.283                  | 0.442                | 50.6                   | 0.181                | 0.366                  | <0.001               | 6.2   | 0.137 | 0.146 | 0.977  |
| Week 3<br>non-tinnitus<br>group | Before noise<br>exposure | 3     | 45.7                   | 0.082                | 0.152                  | 0.016                | 56.3                   | 0.256                | 0.587                  | 0.018                | 1                      | 0.35                 | 0.353                  | 0.256                | 5.3   | 0.196 | 0.207 | 0.08   |
|                                 |                          | 4     | 60.2                   | 0.095                | 0.239                  | <0.001               | 66.7                   | 0.126                | 0.378                  | <0.001               | 27                     | 0.148                | 0.203                  | 0.15                 | 48.4  | 0.123 | 0.238 | 0.001  |
|                                 |                          | 5     | 58.5                   | 0.068                | 0.164                  | 0.029                | 3.5                    | 0.409                | 0.424                  | 0.936                | 10.5                   | 0.406                | 0.454                  | 0.572                | 65.5  | 0.136 | 0.394 | <0.001 |
|                                 |                          | 6     | 22.6                   | 0.126                | 0.163                  | 0.076                | 31.2                   | 0.115                | 0.168                  | 0.005                | -1.6                   | 0.426                | 0.419                  | 0.932                | 41.7  | 0.096 | 0.164 | 0.005  |
|                                 |                          | 7     | 68.2                   | 0.046                | 0.145                  | 0.005                | 61.8                   | 0.1                  | 0.261                  | 0.002                | 2.8                    | 0.172                | 0.177                  | 0.153                | 42.1  | 0.182 | 0.314 | 0.018  |
|                                 |                          | 1     | 44                     | 0.2                  | 0.357                  | 0.001                | 53                     | 0.133                | 0.284                  | <0.001               | 50.1                   | 0.175                | 0.351                  | <0.001               | 47.1  | 0.197 | 0.374 | 0.031  |
|                                 |                          | 2     | 62.7                   | 0.081                | 0.217                  | <0.001               | 62.9                   | 0.069                | 0.187                  | <0.001               | 68.8                   | 0.08                 | 0.256                  | <0.001               | 52.8  | 0.14  | 0.297 | <0.001 |
| 3                               | 53                       | 0.234 | 0.498                  | 0.01                 | 66.3                   | 0.102                | 0.302                  | <0.001               | 61.7                   | 0.123                | 0.321                  | 0.001                | 62.9                   | 0.196                | 0.528 | 0.008 |       |        |
| 4                               | 40.8                     | 0.147 | 0.248                  | 0.008                | 45.8                   | 0.347                | 0.64                   | 0.021                | 45.2                   | 0.248                | 0.453                  | 0.001                | 45.3                   | 0.103                | 0.188 | 0.003 |       |        |
| 5                               | 30.5                     | 0.153 | 0.221                  | <0.001               | 45.8                   | 0.144                | 0.266                  | <0.001               | 63.5                   | 0.167                | 0.457                  | <0.001               | 30.5                   | 0.159                | 0.229 | 0.001 |       |        |
| 6                               | 55.2                     | 0.061 | 0.137                  | 0.001                | 48.9                   | 0.209                | 0.409                  | 0.019                | 55.3                   | 0.243                | 0.543                  | <0.001               | 43.5                   | 0.242                | 0.429 | 0.009 |       |        |
| 7                               | 55.1                     | 0.155 | 0.344                  | 0.01                 | 44                     | 0.286                | 0.51                   | 0.026                | 33.5                   | 0.095                | 0.143                  | 0.041                | 38.5                   | 0.284                | 0.463 | 0.031 |       |        |

Table SII. Continued.

| Group  |                              | Center frequency of the background noise |      |                              |         |          |                      |                              |         |          |                      |                              |         |          |                      |                              |         |          |                      |                              |         |          |                      |
|--------|------------------------------|------------------------------------------|------|------------------------------|---------|----------|----------------------|------------------------------|---------|----------|----------------------|------------------------------|---------|----------|----------------------|------------------------------|---------|----------|----------------------|------------------------------|---------|----------|----------------------|
|        |                              | 3 kHz                                    |      |                              |         |          |                      | 7 kHz                        |         |          |                      |                              |         | 11 kHz   |                      |                              |         |          |                      | 15 kHz                       |         |          |                      |
|        |                              | Exposure                                 | No.  | GPIAS value (%) <sup>a</sup> | RMS-GSR | RMS-NGSR | P-value <sup>b</sup> | GPIAS value (%) <sup>a</sup> | RMS-GSR | RMS-NGSR | P-value <sup>b</sup> | GPIAS value (%) <sup>a</sup> | RMS-GSR | RMS-NGSR | P-value <sup>b</sup> | GPIAS value (%) <sup>a</sup> | RMS-GSR | RMS-NGSR | P-value <sup>b</sup> | GPIAS value (%) <sup>a</sup> | RMS-GSR | RMS-NGSR | P-value <sup>b</sup> |
|        | 3 weeks after noise exposure | 1                                        | 49.3 | 0.11                         | 0.217   | 0.032    | 34.7                 | 0.317                        | 0.486   | 0.001    | 39.6                 | 0.259                        | 0.429   | 0.04     | 35.5                 | 0.235                        | 0.365   | 0.001    | 35.5                 | 0.235                        | 0.365   | 0.001    |                      |
|        |                              | 2                                        | 48   | 0.143                        | 0.276   | <0.001   | 64.4                 | 0.146                        | 0.409   | <0.001   | 61.8                 | 0.078                        | 0.205   | <0.001   | 59.5                 | 0.134                        | 0.33    | <0.001   | 59.5                 | 0.134                        | 0.33    | <0.001   |                      |
|        |                              | 3                                        | 36   | 0.239                        | 0.374   | <0.001   | 42.6                 | 0.075                        | 0.13    | 0.001    | 52.6                 | 0.27                         | 0.568   | 0.001    | 62.8                 | 0.119                        | 0.321   | <0.001   | 62.8                 | 0.119                        | 0.321   | <0.001   |                      |
|        |                              | 4                                        | 35.6 | 0.131                        | 0.203   | <0.001   | 31.2                 | 0.462                        | 0.67    | 0.015    | 43.7                 | 0.224                        | 0.398   | <0.001   | 42.9                 | 0.176                        | 0.309   | <0.001   | 42.9                 | 0.176                        | 0.309   | <0.001   |                      |
|        |                              | 5                                        | 43.2 | 0.124                        | 0.219   | <0.001   | 44.7                 | 0.147                        | 0.266   | <0.001   | 35.8                 | 0.204                        | 0.318   | 0.006    | 37.4                 | 0.244                        | 0.39    | 0.001    | 37.4                 | 0.244                        | 0.39    | 0.001    |                      |
|        |                              | 6                                        | 34.4 | 0.127                        | 0.193   | 0.042    | 46.5                 | 0.136                        | 0.253   | 0.047    | 50.7                 | 0.17                         | 0.345   | 0.018    | 59.4                 | 0.079                        | 0.194   | <0.001   | 59.4                 | 0.079                        | 0.194   | <0.001   |                      |
|        |                              | 7                                        | 35.9 | 0.114                        | 0.177   | 0.038    | 51.8                 | 0.183                        | 0.38    | <0.001   | 46.9                 | 0.132                        | 0.248   | 0.026    | 38.1                 | 0.141                        | 0.227   | 0.036    | 38.1                 | 0.141                        | 0.227   | 0.036    |                      |
| Week 3 | Before noise exposure        | 1                                        | 36   | 0.19                         | 0.297   | 0.025    | 45.1                 | 0.231                        | 0.42    | 0.001    | 40.6                 | 0.266                        | 0.447   | 0.002    | 53.1                 | 0.138                        | 0.296   | <0.001   | 53.1                 | 0.138                        | 0.296   | <0.001   |                      |
|        |                              | 2                                        | 68   | 0.128                        | 0.4     | 0.001    | 47.3                 | 0.299                        | 0.568   | 0.035    | 68.7                 | 0.07                         | 0.224   | <0.001   | 62.1                 | 0.055                        | 0.146   | <0.001   | 62.1                 | 0.055                        | 0.146   | <0.001   |                      |
|        |                              | 3                                        | 44.3 | 0.306                        | 0.548   | <0.001   | 30.3                 | 0.376                        | 0.539   | 0.039    | 52.7                 | 0.089                        | 0.188   | <0.001   | 45.7                 | 0.161                        | 0.296   | 0.002    | 45.7                 | 0.161                        | 0.296   | 0.002    |                      |
|        |                              | 4                                        | 41.1 | 0.133                        | 0.226   | 0.009    | 44.7                 | 0.071                        | 0.128   | <0.001   | 40.7                 | 0.167                        | 0.282   | <0.001   | 49.2                 | 0.223                        | 0.438   | <0.001   | 49.2                 | 0.223                        | 0.438   | <0.001   |                      |
|        |                              | 5                                        | 52.9 | 0.117                        | 0.249   | 0.009    | 53.4                 | 0.138                        | 0.296   | 0.021    | 63.8                 | 0.206                        | 0.568   | <0.001   | 51.9                 | 0.099                        | 0.206   | 0.013    | 51.9                 | 0.099                        | 0.206   | 0.013    |                      |
|        |                              | 6                                        | 49.1 | 0.221                        | 0.434   | <0.001   | 64.4                 | 0.084                        | 0.235   | <0.001   | 37.3                 | 0.195                        | 0.311   | 0.008    | 33.4                 | 0.151                        | 0.226   | 0.038    | 33.4                 | 0.151                        | 0.226   | 0.038    |                      |
|        |                              | 7                                        | 60.1 | 0.097                        | 0.244   | 0.001    | 67.3                 | 0.071                        | 0.218   | 0.001    | 50.1                 | 0.06                         | 0.12    | <0.001   | 60.3                 | 0.098                        | 0.248   | <0.001   | 60.3                 | 0.098                        | 0.248   | <0.001   |                      |
|        |                              | 8                                        | 57.1 | 0.136                        | 0.316   | <0.001   | 47                   | 0.073                        | 0.137   | 0.001    | 47.2                 | 0.174                        | 0.329   | 0.012    | 35.2                 | 0.154                        | 0.238   | 0.029    | 35.2                 | 0.154                        | 0.238   | 0.029    |                      |
|        | 3 weeks after noise exposure | 1                                        | 15.7 | 0.247                        | 0.293   | 0.235    | 47.7                 | 0.097                        | 0.186   | <0.001   | 23.1                 | 0.19                         | 0.247   | 0.287    | 26.6                 | 0.226                        | 0.307   | 0.123    | 26.6                 | 0.226                        | 0.307   | 0.123    |                      |
|        |                              | 2                                        | 55.6 | 0.139                        | 0.313   | <0.001   | 9                    | 0.595                        | 0.654   | 0.499    | 14.9                 | 0.195                        | 0.229   | 0.509    | 41                   | 0.149                        | 0.252   | 0.006    | 41                   | 0.149                        | 0.252   | 0.006    |                      |
|        |                              | 3                                        | 40   | 0.3                          | 0.5     | 0.011    | 18.1                 | 0.401                        | 0.49    | 0.253    | 53.2                 | 0.062                        | 0.134   | 0.003    | 57.4                 | 0.162                        | 0.38    | 0.002    | 57.4                 | 0.162                        | 0.38    | 0.002    |                      |
|        |                              | 4                                        | 36.9 | 0.136                        | 0.215   | 0.001    | 12.3                 | 0.119                        | 0.135   | 0.214    | 18.2                 | 0.233                        | 0.285   | 0.109    | 35.7                 | 0.252                        | 0.392   | 0.02     | 35.7                 | 0.252                        | 0.392   | 0.02     |                      |
|        |                              | 5                                        | 24.6 | 0.118                        | 0.157   | 0.345    | -4.8                 | 0.35                         | 0.334   | 0.994    | 15.4                 | 0.371                        | 0.438   | 0.716    | 16                   | 0.143                        | 0.17    | 0.137    | 16                   | 0.143                        | 0.17    | 0.137    |                      |
|        |                              | 6                                        | 6.5  | 0.211                        | 0.226   | 0.64     | 11.6                 | 0.363                        | 0.41    | 0.509    | 53.3                 | 0.097                        | 0.208   | 0.011    | 57.8                 | 0.073                        | 0.173   | 0.001    | 57.8                 | 0.073                        | 0.173   | 0.001    |                      |
|        |                              | 7                                        | 14.9 | 0.233                        | 0.274   | 0.232    | -29.9                | 0.37                         | 0.285   | 0.976    | 54.4                 | 0.125                        | 0.273   | 0.002    | 17                   | 0.302                        | 0.364   | 0.305    | 17                   | 0.302                        | 0.364   | 0.305    |                      |
|        |                              | 8                                        | 4.9  | 0.396                        | 0.417   | 0.733    | 13.6                 | 0.198                        | 0.229   | 0.563    | 27.8                 | 0.28                         | 0.388   | 0.121    | 40.3                 | 0.179                        | 0.3     | 0.02     | 40.3                 | 0.179                        | 0.3     | 0.02     |                      |

<sup>a</sup>GPIAS value =  $[1 - (\text{RMS-GSR}/\text{RMS-NGSR})] \times 100$ . <sup>b</sup>Two-tailed Student's t-test was used to determine whether there was a significant difference between GSR and NGSR. RMS-GSR, root-mean-squared values of the gap-conditioned startle responses. RMS-NGSR, root-mean-squared values of the non-gap-conditioned startle responses.

Table III. Mean ABR thresholds (dB SPL) at the left side in the third section.

| Group                                         | 3 kHz    | 7 kHz     | 11 kHz   | 15 kHz   |
|-----------------------------------------------|----------|-----------|----------|----------|
| Week 1 non-tinnitus/Week 3 non-tinnitus group |          |           |          |          |
| Baseline                                      | 21.1±3.2 | 23.2±4.8  | 22.4±3.9 | 22.4±3.9 |
| Day 1                                         | 37.4±4.5 | 50.3±6.3  | 68.2±6.7 | 64.2±7.7 |
| Week 1                                        | 30.5±6.2 | 33.2±7.9  | 42.4±6.7 | 39.7±7.2 |
| Week 2                                        | 26.8±5.6 | 27.6±6.9  | 40.3±5.6 | 38.4±8.3 |
| Week 3                                        | 22.4±3.9 | 22.4±3.9  | 25.0±4.7 | 22.6±4.5 |
| Week 1 non-tinnitus/Week 3 tinnitus group     |          |           |          |          |
| Baseline                                      | 22.5±2.9 | 22.5±2.9  | 23.8±4.8 | 23.8±4.8 |
| Day 1                                         | 35.0±7.1 | 52.5±2.9  | 67.5±8.7 | 62.5±5.0 |
| Week 1                                        | 30.0±8.2 | 32.5±9.6  | 46.3±4.8 | 40.0±7.1 |
| Week 2                                        | 27.5±5.0 | 30.0±8.2  | 41.3±2.5 | 37.5±5.0 |
| Week 3                                        | 25.0±5.8 | 22.5±5.0  | 25.0±4.1 | 25.0±5.8 |
| Week 1 tinnitus/Week 3 non-tinnitus group     |          |           |          |          |
| Baseline                                      | 20.0±0.0 | 24.0±5.5  | 23.0±4.5 | 23.0±4.5 |
| Day 1                                         | 36.0±4.2 | 51.0±7.4  | 69.0±7.4 | 64.0±8.9 |
| Week 1                                        | 28.0±4.5 | 32.0±9.1  | 41.0±7.4 | 37.0±5.7 |
| Week 2                                        | 26.0±6.5 | 27.0±4.5  | 39.0±5.5 | 37.0±5.7 |
| Week 3                                        | 23.0±4.5 | 23.0±4.5  | 25.0±5.0 | 22.0±4.5 |
| Week 1 tinnitus/Week 3 tinnitus group         |          |           |          |          |
| Baseline                                      | 22.3±4.0 | 21.4±3.5  | 22.7±4.3 | 22.5±3.7 |
| Day 1                                         | 35.9±6.3 | 51.6±6.1  | 67.3±5.9 | 62.5±5.3 |
| Week 1                                        | 30.7±6.6 | 32.0±7.3  | 43.4±4.7 | 40.9±7.7 |
| Week 2                                        | 26.8±4.8 | 29.3± 6.6 | 39.5±4.6 | 36.1±6.3 |
| Week 3                                        | 21.8±3.9 | 22.7±4.6  | 25.0±5.1 | 25.7±4.7 |

Data are presented as the mean ± SD. ABR, auditory brainstem response; SPL, sound pressure level.
